# Supplementary material for: Reducing reliability bias in assessments of extreme weather risk using calibrating priors
Source: Copernicus journal article supplement (doi:10.5194/ascmo-11-1-2025), 2025-02-20
Supplement: Supplementary file 1 [file ascmo-11-1-2025-supplement.pdf]

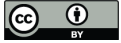

*Supplement of*

## **Reducing reliability bias in assessments of extreme weather risk using calibrating priors**

**Stephen Jewson et al.**

*Correspondence to:* Stephen Jewson ([stephen.jewson@gmail.com](mailto:stephen.jewson@gmail.com))

The copyright of individual parts of the supplement might differ from the article licence.

## S1 Return Level and Return Period Sampling Biases

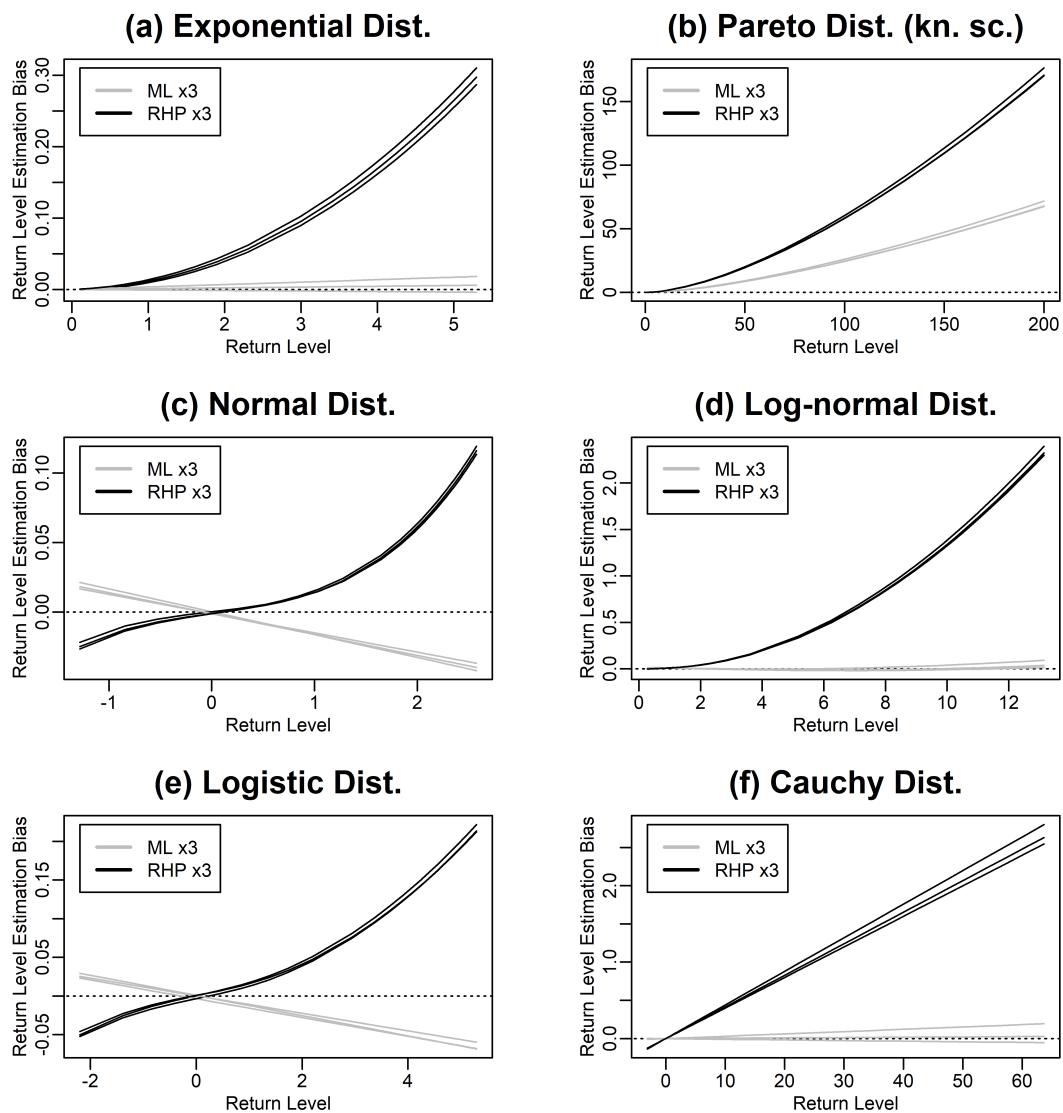

**Figure S1.** Return level sampling bias versus return level for predictions generated using maximum likelihood (ML, grey) and right Haar priors (RHP, black), for various distributions. Each panel shows 6 lines, consisting of 3 lines from 3 independent evaluations of the performance of maximum likelihood, and 3 lines from 3 independent evaluations of the performance of RHP.

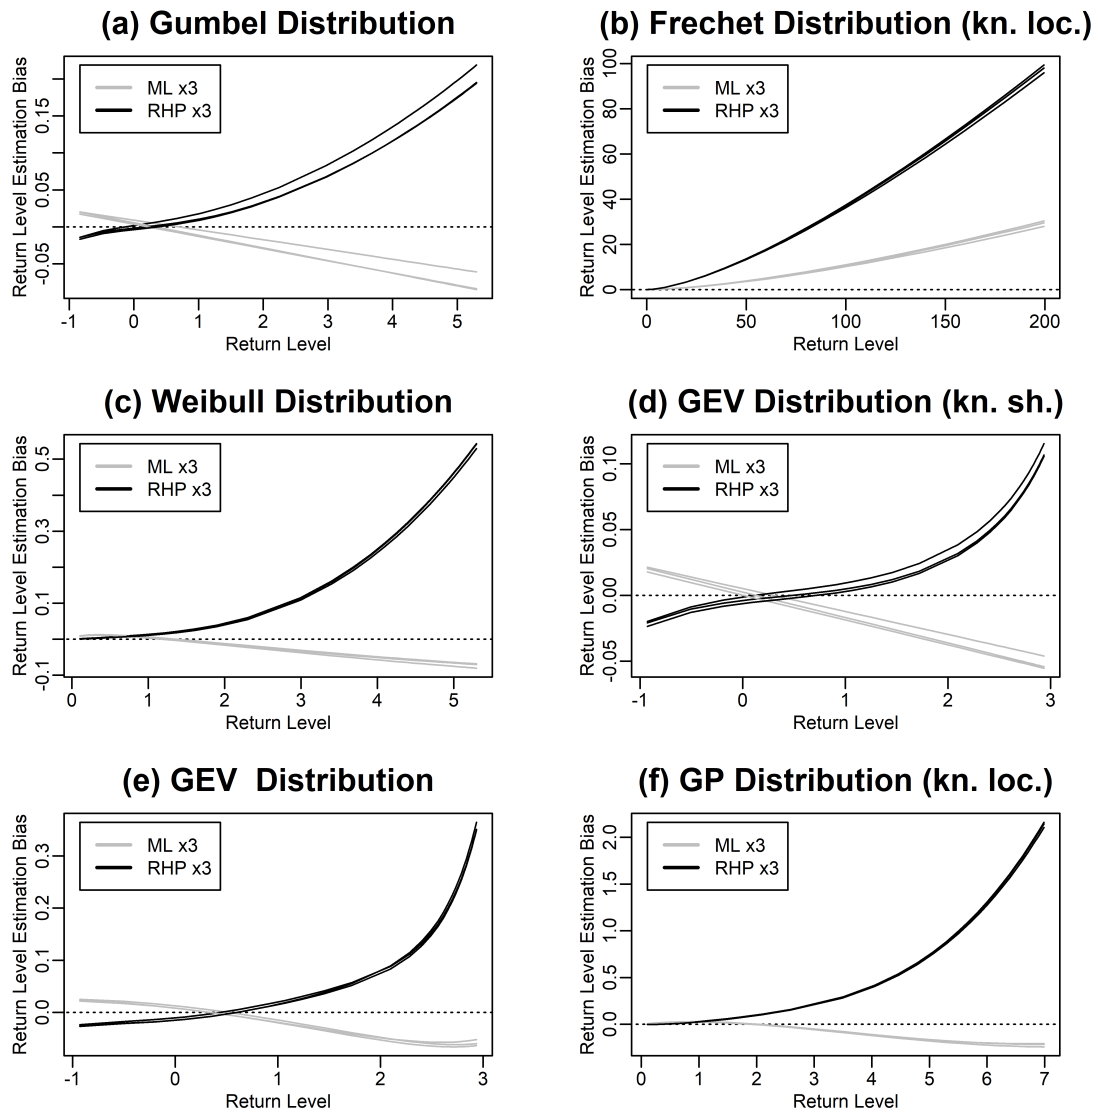

**Figure S2.** As supplemental material (SM) Figure S1, but for different distributions.

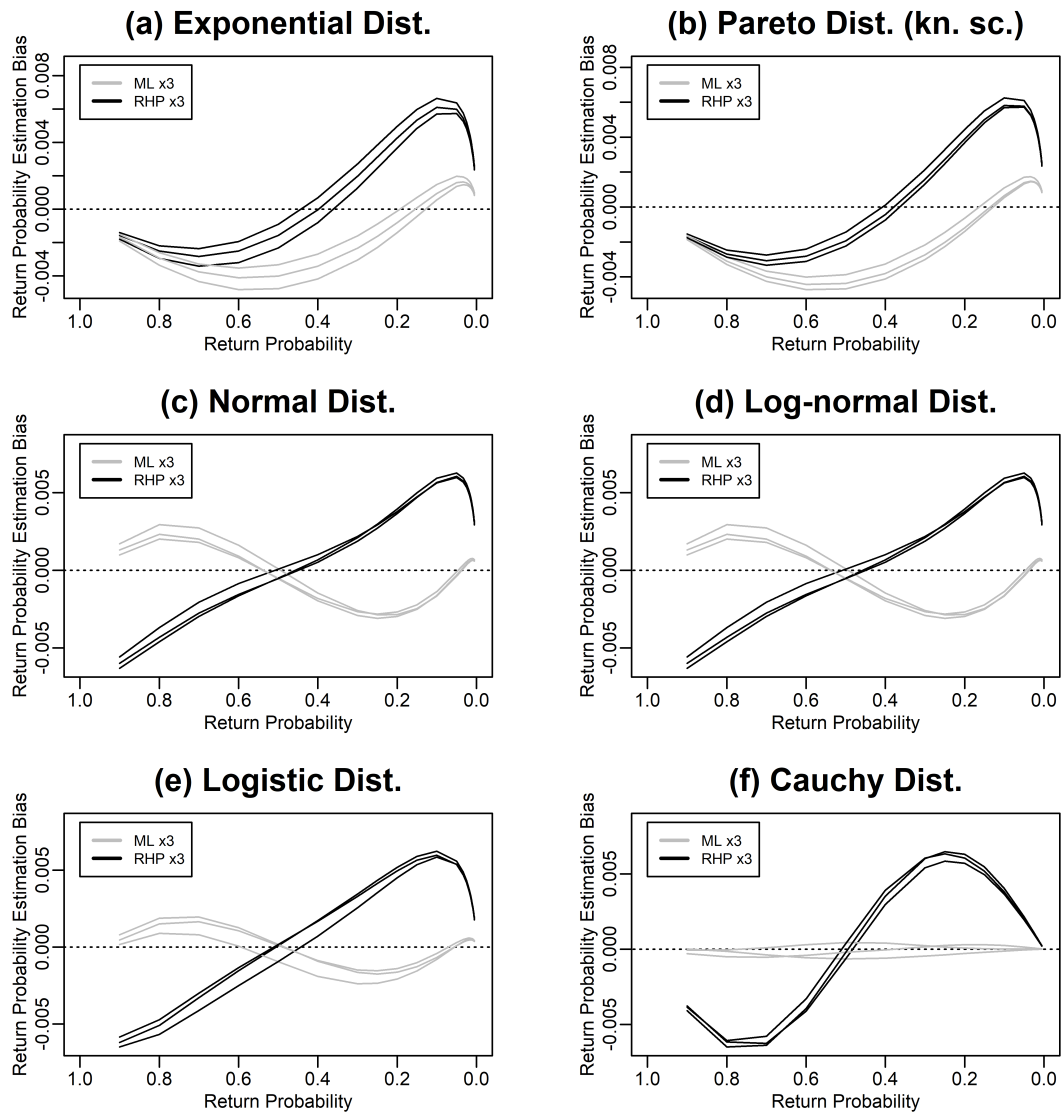

**Figure S3.** As SM Figure S1, but for return probability bias versus return probability.

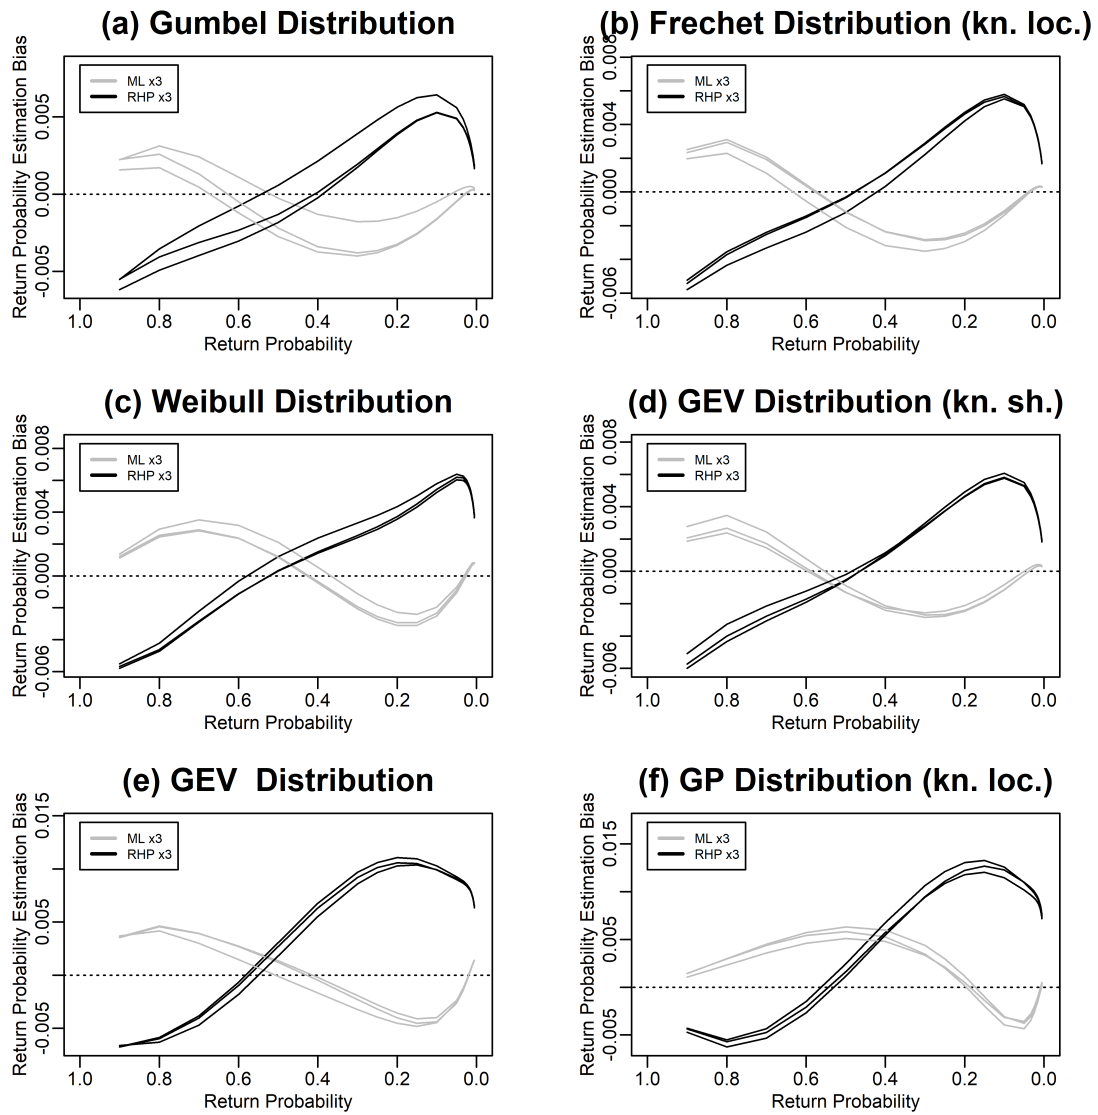

**Figure S4.** As SM Figure S2, but for return probability bias versus return probability.

## S2 Reliability Biases for GEV with Predictors

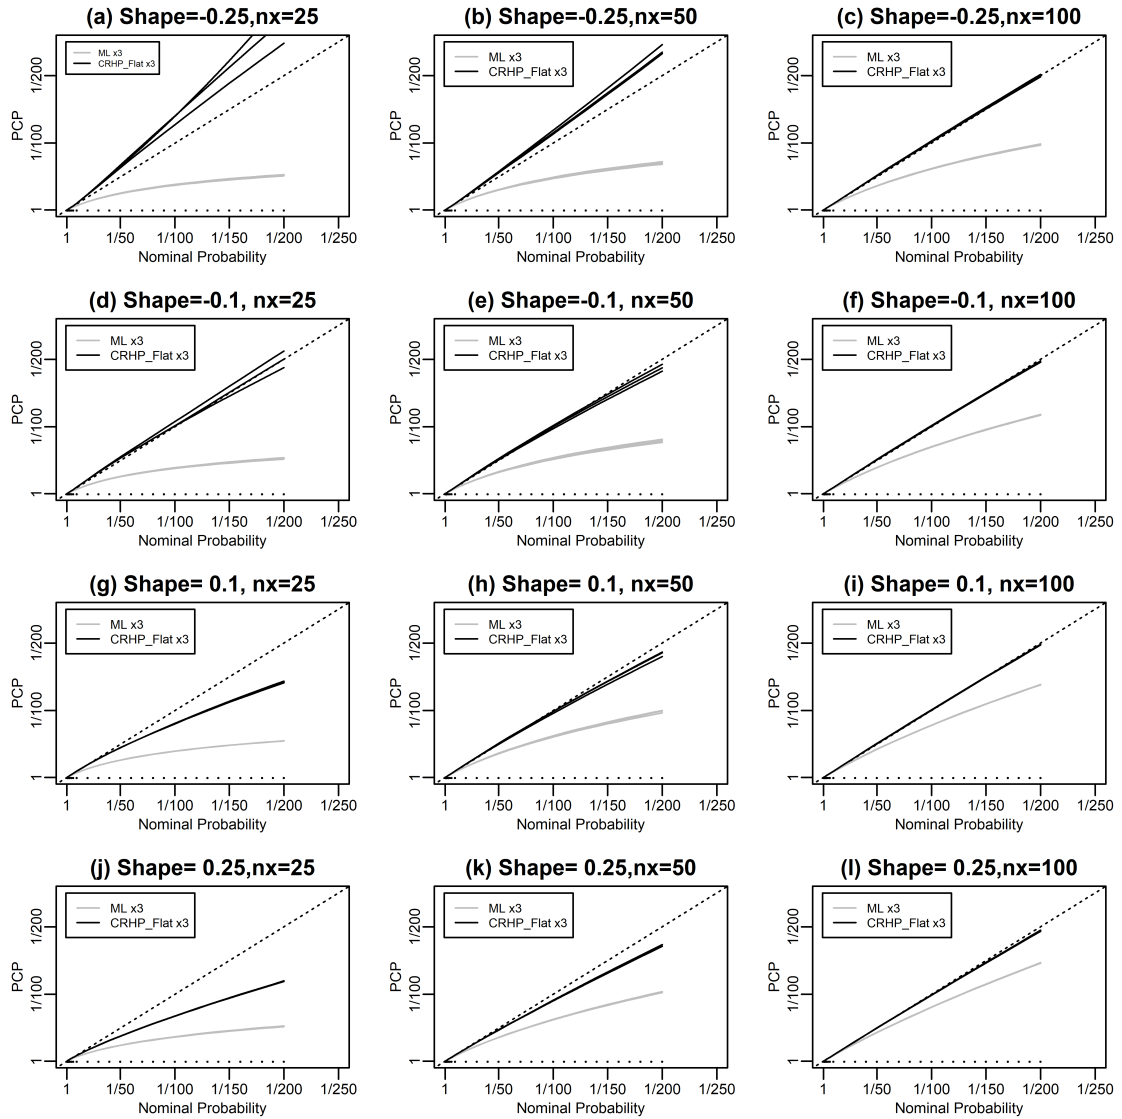

**Figure S5.** Evaluation of the performance of various methods for predicting data simulated from a GEVD with a predictor on the location parameter. The three rows correspond to sample sizes of 25, 50 and 100, respectively. The four columns correspond to values of the shape parameter of -0.25, -0.1, 0.1 and 0.25, respectively. Two methods are used to make the predictions: maximum likelihood and Bayesian prediction using DMGS with the RHP on the location and scale parameters and a flat prior on the shape parameter.

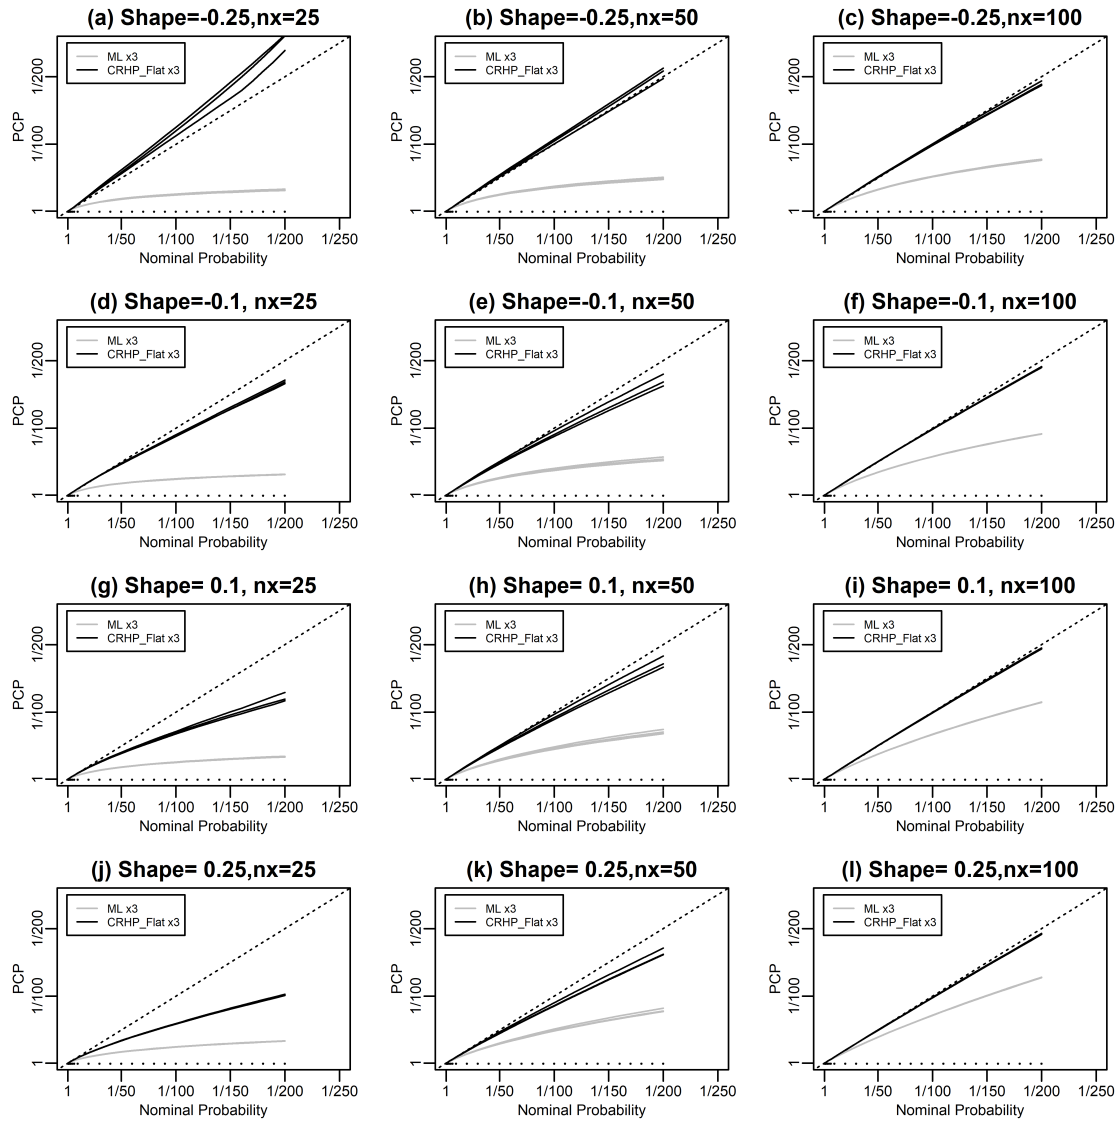

**Figure S6.** As SM Figure S5, but now for the GEV with predictors on the location and scale parameters.

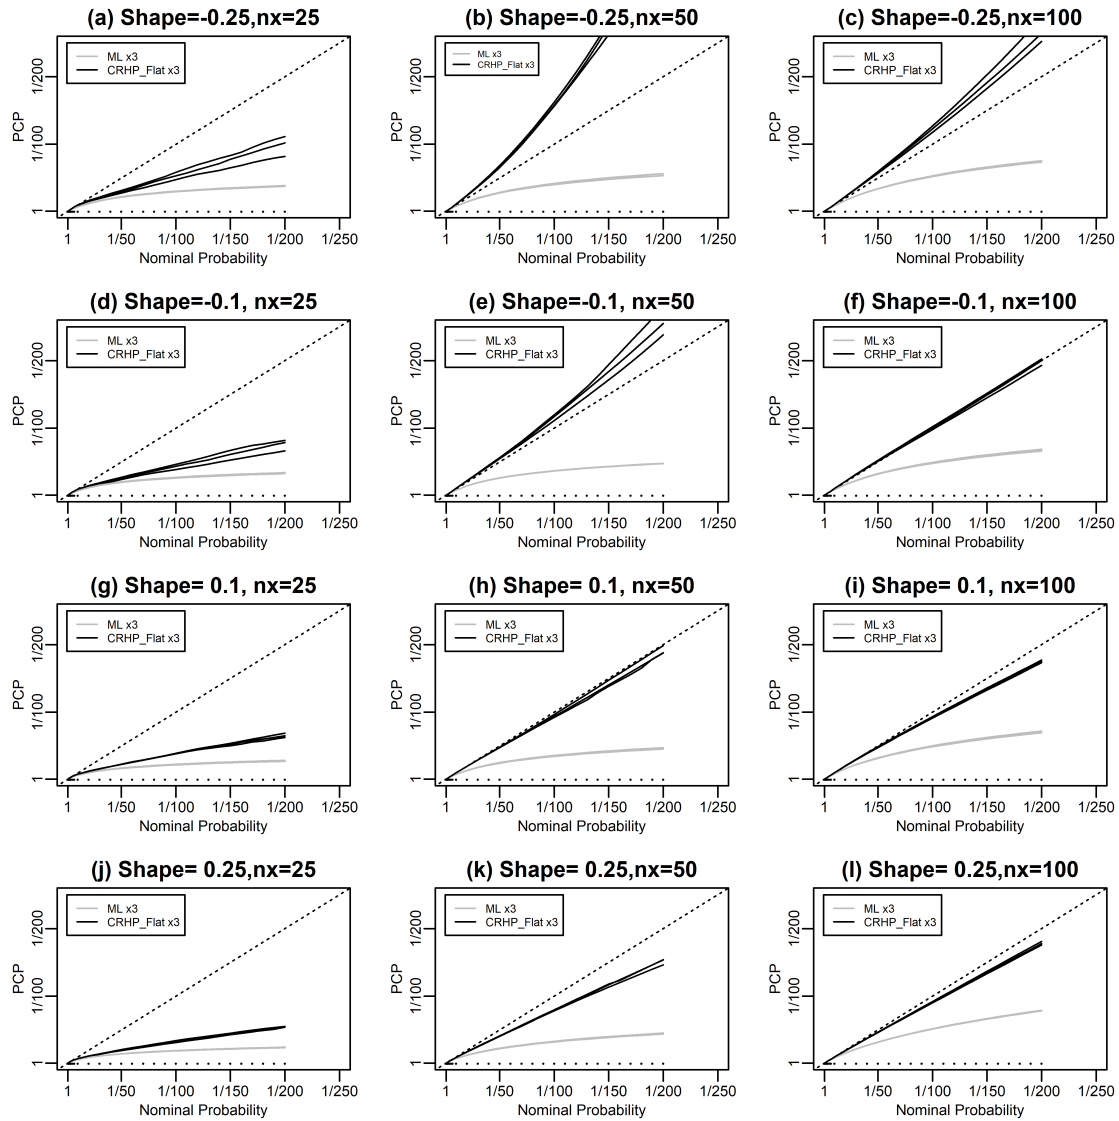

**Figure S7.** As SM Figure S5, but now for the GEV with predictors on the location, scale and shape parameters.



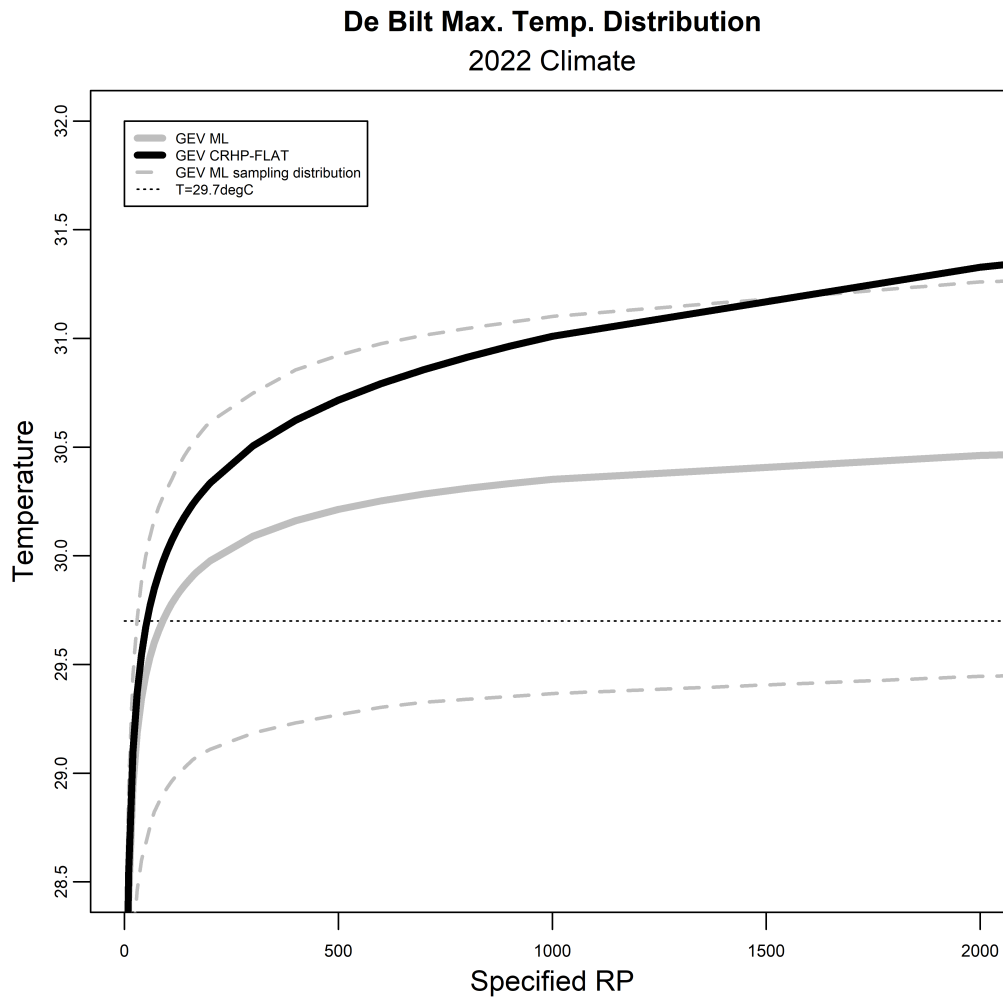

**Figure S8.** Return probabilities from the maximum likelihood (grey) and CRHP-flat (black) versions of the GEV1 model (as shown in the main article Figure 7), along with bootstrap-based 90% confidence intervals for the maximum likelihood model (grey dashed).

### De Bilt Max. Temp. Distribution 2022 Climate

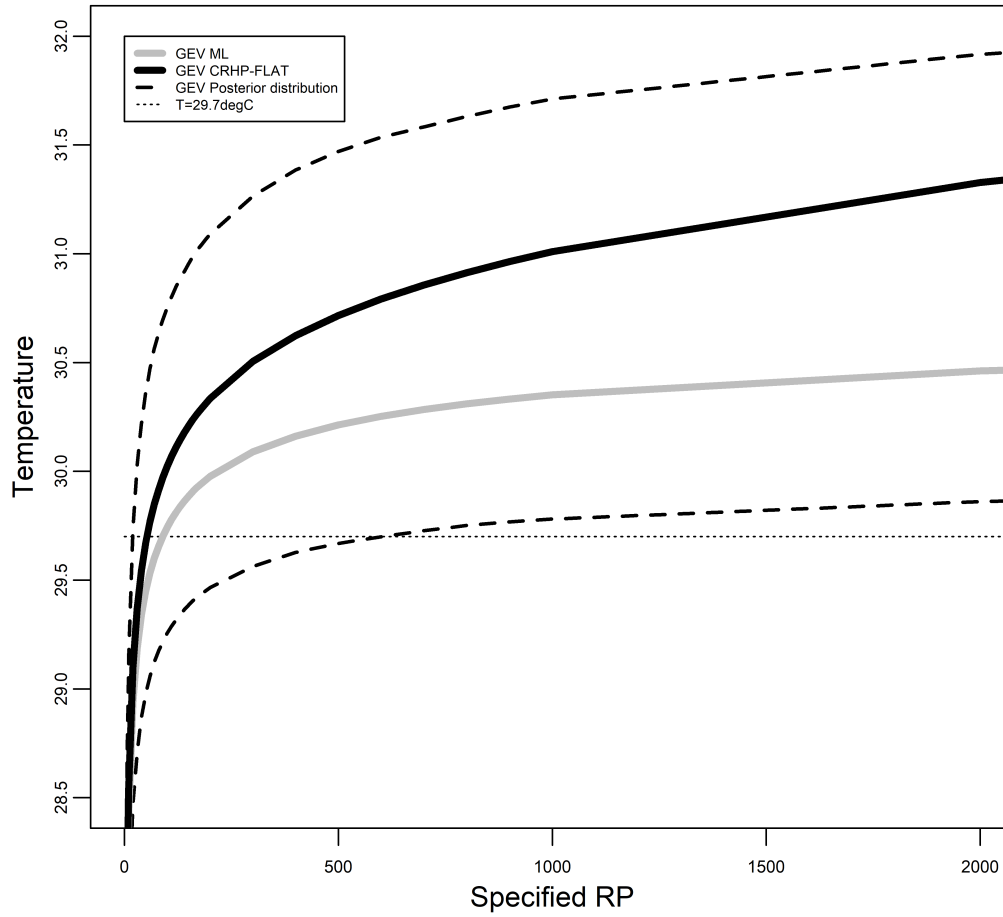

**Figure S9.** Return probabilities from the maximum likelihood (grey) and CRHP-flat (black) versions of the GEV1 model (as shown in the main article Figure 7), along with 5% to 95% uncertainty bands generated by sampling the parameter posterior for the CRHP-flat model (black dashed).
